# Supplementary material for: Response of Human Liver Tissue to Innate Immune Stimuli
Source: PubMed Central journal article supplement (PMC8959492; doi:10.3389/fimmu.2022.811551), 2022-03-09
Supplement: Table_1.pdf [file Table_1.pdf]

Table S1 Patient information

**Chronic HCV-infected patients**

| Patient # | Patient ID    | Age | Sex | Diagnosis | HCV genotype | HCV RNA quantitation (IU/50 ng total RNA) <sup>1</sup> |                  | Prior HCV treatment |
|-----------|---------------|-----|-----|-----------|--------------|--------------------------------------------------------|------------------|---------------------|
|           |               |     |     |           |              | D0                                                     | D7               |                     |
| 1         | Chronic HCV_1 | 65  | M   | HCC       | HCV G1a      | 3371.3                                                 | 2611.5           | Not treated         |
| 2         | Chronic HCV_2 | 54  | M   | ICC       | HCV G1a      | 8.2                                                    | 1.8              | Not treated         |
| 3         | Chronic HCV_3 | 71  | M   | HCC       | HCV G2       | 1.2                                                    | 76.7             | Not treated         |
| 4         | Chronic HCV_4 | 67  | M   | HCC       | HCV G1a      | 3562.7                                                 | 1762.0           | Not treated         |
| 5         | Chronic HCV_5 | 66  | M   | HCC       | HCV G1b      | 638.8                                                  | 135.2            | Not treated         |
| 6         | Chronic HCV_6 | 71  | M   | HCC       | HCV G1a      | 3279.5                                                 | 405.0            | Not treated         |
| 7         | Chronic HCV_7 | 68  | F   | HCC       | HCV G1b      | 9760.1                                                 | 14365.8          | Not treated         |
| 8         | Chronic HCV_8 | 41  | F   | ICC       | HCV G6       | 6769.8                                                 | N/A <sup>2</sup> | Not treated         |

<sup>1</sup>The limit of detection in the assay was 1.2 IU/50 ng liver total RNA.

<sup>2</sup>HCV\_8 only studied the day 0 time point.

Table S1 (continued)

**HCV-DAA-cured patients**

| Patient # | Patient ID | Age | Sex | Diagnosis | HCV genotype <sup>1</sup> | HCV RNA quantitation (IU/50ng total RNA) | DAA <sup>3</sup> treatment duration | Time from completion of DAA treatment to HCC surgery with sample collection <sup>4</sup> |
|-----------|------------|-----|-----|-----------|---------------------------|------------------------------------------|-------------------------------------|------------------------------------------------------------------------------------------|
|           |            |     |     |           |                           | D0                                       |                                     |                                                                                          |
| 1         | HCV-DAA_1  | 77  | F   | HCC       | HCV G1b                   | non-detect                               | 12 weeks                            | 9 months                                                                                 |
| 2         | HCV-DAA_2  | 65  | F   | HCC       | N/A                       | non-detect                               | N/A                                 | N/A                                                                                      |
| 3         | HCV-DAA_3  | 58  | M   | HCC       | HCV G1a                   | non-detect                               | 12 weeks                            | 10 months                                                                                |
| 4         | HCV-DAA_4  | 62  | M   | HCC       | HCV G1a                   | non-detect                               | 24 weeks                            | 12 months                                                                                |
| 5         | HCV-DAA_5  | 59  | F   | HCC       | HCV G1b                   | non-detect                               | 12 weeks                            | 7 months                                                                                 |
| 6         | HCV-DAA_6  | 77  | M   | HCC/ICC   | N/A                       | non-detect                               | 8 weeks                             | less than 1 month                                                                        |
| 7         | HCV-DAA_7  | 62  | F   | ICC       | HCV G1a or G1b            | non-detect                               | 24 weeks                            | 9 months                                                                                 |
| 8         | HCV-DAA_8  | 62  | F   | HCC       | HCV G1a                   | non-detect                               | 12 weeks                            | less than 1 month                                                                        |
| 9         | HCV-DAA_9  | 60  | M   | HCC       | HCV G1a                   | non-detect                               | 12 weeks                            | 20 months                                                                                |
| 10        | HCV-DAA_10 | 69  | M   | HCC       | N/A                       | 0.3,<br>Below LoD <sup>2</sup>           | 12 weeks                            | 9 months                                                                                 |

<sup>1</sup>Genotype was obtained with clinical information prior to DAA treatment. N/A referred to HCV of unknown genotypes. Such patients were documented with HCV infection, however without genotype information.

<sup>2</sup>The 0.3 IU/50 ng liver total RNA was below the limit of detection (LoD), which was 1.2 IU/50 ng liver total RNA. Thus, this patient is HCV negative.

<sup>3</sup>The DAA group was treated with ledipasvir/sofosbuvir (Harvoni), which is IFN-free therapy.

<sup>4</sup>This indicates the time from completion of DAA treatment to HCC surgery when the liver specimens were collected and analyzed.

Table S1 (continued)

**Non-infected patients**

| Patient # | Patient ID                  | Age | Sex | Diagnosis                | HCV RNA quantitation (IU/50ng total RNA) |
|-----------|-----------------------------|-----|-----|--------------------------|------------------------------------------|
|           |                             |     |     |                          | D0                                       |
| 1         | Non-infected_1 <sup>a</sup> | 67  | F   | Mullerian tumor          | non-detect                               |
| 2         | Non-infected_2              | 75  | M   | ICC                      | non-detect                               |
| 3         | Non-infected_3 <sup>a</sup> | 36  | M   | Cholangiocarcinoma       | non-detect                               |
| 4         | Non-infected_4 <sup>a</sup> | 62  | M   | Colorectal cancer        | non-detect                               |
| 5         | Non-infected_5 <sup>a</sup> | 35  | F   | Hepatocellular carcinoma | non-detect                               |
| 6         | Non-infected_6 <sup>a</sup> | 41  | F   | ICC                      | non-detect                               |
| 7         | Non-infected_7              | 65  | F   | Neuroadenoma metastasis  | non-detect                               |
| 8         | Non-infected_8              | 52  | F   | CRC                      | non-detect                               |
| 9         | Non-infected_9              | 33  | F   | Angiomyolipoma           | non-detect                               |
| 10        | Non-infected 10             | 46  | F   | Hepatic adenoma          | 0.3,<br>Below LoD <sup>1</sup>           |
| 11        | Non-infected 11             | 57  | F   | CRC                      | non-detect                               |

<sup>a</sup>The specimens of these patients were published previously in (Wu et al. J Immunol Methods 2018). The gene expression data are incorporated into the current manuscript. Because new non-infected controls are added, we are now in a position to draw stronger conclusions from this extended dataset, far beyond those drawn from the proof-of-concept experiments we published previously (Wu et al, 2018). This justifies the re-analysis of the same samples as part of larger groups.

<sup>1</sup>The 0.3 IU/50 ng liver total RNA was below the limit of detection (LoD), which was 1.2 IU/50 ng liver total RNA. Thus, this patient is HCV negative.
